1 **PNAG exopolysaccharide eradication gives neutrophils access to *Staphylococcus***  
2 ***aureus* biofilm infections**

3

4

5 Rachel M. Kratofil<sup>1,2</sup>, Trevor E. Randall<sup>3</sup>, Josefien W. Hommes<sup>1,2</sup>, Rehnuma Sejuty<sup>3</sup>,  
6 Jessica Chisholm<sup>3,4</sup>, Deepa Raju<sup>5</sup>, Mario Vargas<sup>5</sup>, P. Lynne Howell<sup>5,6</sup>, Gerald B. Pier<sup>7</sup>,  
7 Douglas W. Morck<sup>3,4</sup>, Joe J. Harrison<sup>3</sup>, and Paul Kubes<sup>1,2,\*</sup>

8

9

10 <sup>1</sup>Department of Physiology and Pharmacology, University of Calgary, Calgary, Alberta  
11 T2N 4N1, Canada

12

13 <sup>2</sup>Calvin, Phoebe, and Joan Snyder Institute for Chronic Diseases, University of Calgary,  
14 Calgary, Alberta T2N 4N1, Canada

15

16 <sup>3</sup>Department of Biological Sciences, University of Calgary, Calgary, Alberta, Canada

17

18 <sup>4</sup>Department of Comparative Biology and Experimental Medicine, University of Calgary,  
19 Calgary, Alberta, Canada

20

21 <sup>5</sup>Program in Molecular Medicine, The Hospital for Sick Children, Toronto, Ontario,  
22 Canada

23

24 <sup>6</sup>Department of Biochemistry, University of Toronto, Toronto, Ontario, Canada

25

26 <sup>7</sup>Division of Infectious Diseases, Department of Medicine, Brigham and Women's  
27 Hospital/Harvard Medical School, Boston, MA, United States

28

29

30

31 \*Corresponding author

32

33 **Email:** [pkubes@ucalgary.ca](mailto:pkubes@ucalgary.ca)

34

35

## 36 **Abstract**

37 *Staphylococcus aureus* (*S. aureus*) can form biofilms on biotic or abiotic surfaces making  
38 biofilm infections a relevant clinical problem. Biofilms can evade immunity and resist  
39 antimicrobial treatment, and as such an understanding of biofilm infection *in vivo* is  
40 necessary to inform new therapeutics. Using a mouse model of *S. aureus* foreign-body skin  
41 infection and intravital microscopy, we imaged the interactions between neutrophils and *S.*  
42 *aureus* biofilm. We observed that neutrophils were separated from bacteria by a biofilm  
43 matrix composed of the polysaccharide intercellular adhesin (PIA), an exopolysaccharide  
44 chemically designated as poly-N-acetylglucosamine (PNAG) that is produced by  
45 enzymatic machinery encoded by the *icaADBC* operon. Infection with *icaADBC*-deficient  
46 *S. aureus* strains led to increased neutrophil infiltration and access to bacteria and resulted  
47 in full clearance of infection by 7 days. Moreover, enzymatic treatment with PgaB, which  
48 hydrolyzes partially deacetylated PNAG, was shown to disaggregate the biofilm giving  
49 neutrophils access into the infection site to improve clearance. Taken together, our results  
50 show that PNAG shelters *S. aureus* biofilms from innate host defense, and that targeting  
51 the biofilm matrix with glycoside hydrolases is a promising therapeutic avenue to treat *S.*  
52 *aureus* biofilm infections.

53

## 54 **Author Summary**

55 *Staphylococcus aureus* is a major cause of biofilm-associated infections, which pose a  
56 major threat to human health. A biofilm is difficult to treat since bacteria are protected from  
57 antimicrobials within an extracellular matrix. This study is the first to show that the PgaB  
58 enzyme, a glycoside hydrolase, can disrupt the *S. aureus* biofilm matrix *in vivo*. Disrupting  
59 the biofilm matrix with PgaB gives neutrophils access to bacteria for elimination.

60

61

62

## 63 Introduction

64

65 *Staphylococcus aureus* is a leading cause of bacterial infection and foreign-body  
66 associated infections worldwide, and alternatives to antibiotics are needed to defeat these  
67 infections. The ability of *S. aureus* to form biofilm on surfaces such as catheters and  
68 medical implants, or host tissues such as bone and heart valves, contributes to its  
69 persistence in chronic infections (1). Biofilms are difficult to eradicate, as they present as  
70 a physical barrier to the host immune system and cells within the biofilm are tolerant to  
71 antimicrobials (1). The standard of practice to resolve biofilm infections is removal of the  
72 infected device, which puts the patient more at risk for developing further complications  
73 such as surgical site infections (2). Currently, there are no therapeutics in practice that are  
74 specifically designed to disrupt the *S. aureus* biofilm.

75

76 A first step of biofilm formation often involves the attachment of planktonic  
77 bacterial cells to a surface such as a foreign body, followed by growth and maturation of  
78 the biofilm (3). We previously described that pre-formed aggregates of *S. aureus* in the  
79 early stages of biofilm development were resistant to neutrophil-mediated killing and that  
80 neutrophils recruited to the skin were unable to eliminate the bacteria (4). This observation  
81 led us to hypothesize that components of the *S. aureus* biofilm matrix hinder the innate  
82 immune response leading to a persistent infection.

83

84 The extracellular matrix is a hallmark of biofilm formation. The biofilm matrix  
85 functions to protect bacteria from hostile environmental factors such as the host immune  
86 system as well as antibiotics (5). In many bacterial species, biofilm matrix polysaccharides  
87 such as cellulose, acetylated cellulose, poly- $\beta$ -1,6-*N*-acetyl-D-glucosamine (PNAG), Pel,  
88 and alginate are produced by various biosynthetic machineries (6, 7). In addition to the  
89 biofilm matrix polymers, other components of the biofilm matrix include proteins, teichoic  
90 acids, and extracellular DNA (eDNA) (5).

91

92 Staphylococcal biofilms are divided into two broad categories depending on the  
93 composition of the EPS: polysaccharide-dependent and polysaccharide-independent  
94 protein-rich biofilms. Staphylococci produce one main exopolysaccharide in the EPS,  
95 initially designated as the polysaccharide intercellular adhesin (PIA), which is made up of  
96 repeating monomers of  $\beta$ -1-6-linked *N*-acetyl glucosamine monomers to form PNAG. This  
97 extracellular polymer is synthesized by the enzymatic machinery encoded in the *icaADBC*

98 operon (8, 9). Partial deacetylation of PNAG by IcaB modifies the charge of the polymer  
99 which is required for biofilm formation (10). Since its original description in *S. epidermidis*  
100 (11), the *icaADBC* operon has been identified in multiple *S. aureus* strains including *S.*  
101 *aureus* MW2, a clinically relevant USA400 methicillin-resistant *S. aureus* (MRSA) strain  
102 (12, 13). In addition, clinical isolates of *S. aureus* have been shown to upregulate *icaADBC*  
103 compared to commensal *S. aureus* species (14, 15). *In vivo*, PNAG has been shown to  
104 establish an invasive lung infection where deletion of *ica* in *S. aureus* resulted in fewer  
105 lung abscesses and a reduction in bacterial burden from the lungs of infected mice (16).

106

107 Due to the rise of antibiotic resistant strains, alternatives to treating *S. aureus*  
108 infections are needed. One strategy is to disrupt the biofilm by targeting the  
109 exopolysaccharide biofilm matrix with glycoside hydrolase enzymes (17). Previous studies  
110 have shown that the glycoside hydrolases  $\alpha$ -amylase and cellulase can degrade  
111 *Pseudomonas aeruginosa* and *S. aureus* biofilms *in vitro* and *ex vivo* (18, 19). Dispersin B  
112 (DspB), which degrades PNAG (20), has been shown to reduce *S. aureus* colonization in a  
113 rabbit model of subcutaneous implant infection (21). In addition, we have previously  
114 shown that *S. aureus* biofilms can be disrupted by the glycoside hydrolase enzyme PgaB  
115 *in vitro*, where PgaB hydrolyzes partially deacetylated PNAG (22). However, no studies  
116 have determined the role of PNAG or glycoside hydrolase treatment on immune function  
117 during *S. aureus* infection *in vivo*.

118

119 In the present study, we have used a foreign body biofilm infection model using *S.*  
120 *aureus* agar beads to image the host response to *S. aureus* biofilm, as previously described  
121 (23). We show that the persistence is due to PIA exopolysaccharide which acts as a physical  
122 barrier that protects bacteria from the host immune system and hinders neutrophils from  
123 accessing bacteria. Infection with biofilm-deficient *S. aureus* mutants in the bead increased  
124 immune cell infiltration into the infection site at 24 hours, leading to enhanced bacterial  
125 clearance at 7 days. Imaging the biofilm revealed that neutrophils utilized elastase to  
126 infiltrate into the infection site but were sequestered at a distance from bacterial clusters  
127 separated by the PIA biofilm. After infection with biofilm-deficient strains, neutrophils  
128 were able to migrate further into the infection site and access bacterial clusters. Finally,  
129 enzymatically disrupting the biofilm matrix with PgaB, an enzyme that hydrolyzes partially  
130 deacetylated PNAG (22), improved neutrophil access to bacterial clusters and eradication  
131 *in vivo* suggesting that disrupting the biofilm matrix with glycoside hydrolases is a  
132 promising therapeutic option to treat biofilm infections.

133

134

## 135 **Results**

136

137 Despite the evidence that *S. aureus* readily forms biofilm on foreign material such  
138 as indwelling catheters, medical devices, prostheses, and host tissue, the innate immune  
139 response to *in vivo* biofilm infection remains largely unexplored. To investigate the  
140 immune response to biofilm infection *in vivo*, we utilized a foreign body skin infection  
141 model in combination with microscopy, transgenic reporter mice and genome-engineered  
142 strains of *S. aureus* MW2, a clinically relevant MRSA strain (24).

143

### 144 **PIA exopolysaccharide is produced during *in vivo* biofilm** 145 **infection**

146 We have recently described a low dose foreign body infection model using *S.*  
147 *aureus*-contaminated agar beads (500 CFU/bead). This low dose infection formed biofilm  
148 *in vivo* and mice infected with an *S. aureus* bead took longer to clear infection compared  
149 to mice infected with planktonic *S. aureus* (23). Using this infection model, we investigated  
150 the role of polysaccharide-dependent biofilm formation by engineering an *S. aureus* MW2  
151 strain with a complete, unmarked deletion of all 4 genes in the intercellular adhesion (*Ica*)  
152 operon ( $\Delta$ *icaADBC*, see methods). At 24 hours post-infection, beads embedded with wild  
153 type *S. aureus* MW2 in beads showed evidence of biofilm formation, with clusters of *S.*  
154 *aureus* cells interconnected together by strands of exopolysaccharide filaments, similar to  
155 that reported previously (25) (**Figure 1A**). By contrast, only single cells of *S. aureus* and  
156 no interconnected biofilm matrix were observed from  $\Delta$ *icaADBC* *S. aureus* embedded  
157 beads (**Figure 1B**). This biofilm phenotype was also validated *in vitro* using the Calgary  
158 Biofilm Device (26, 27), and the microplate biofilm assay (28) where  $\Delta$ *icaADBC* formed  
159 significantly less biofilm when compared to wild type bacteria (**Figure 1C-D**).

160

161 Using multiphoton intravital microscopy, we imaged the infection at 24 hours and  
162 labeled the biofilm matrix with a fluorescently-conjugated monoclonal antibody (F598)  
163 that recognizes PNAG (29). A 3D reconstruction of *S. aureus* GFP<sup>+</sup> clusters within the  
164 infection site revealed that PNAG (blue-green) was visualized surrounding wild type  
165 bacteria (yellow) in skin, which was not observed in  $\Delta$ *icaADBC* infections (**Figure 1E**).  
166 Dot blots also confirmed PNAG production *in vitro* in wild type *S. aureus* but not  
167  $\Delta$ *icaADBC* *S. aureus* (**Figure 1F**).

168

169 We next tested the ability for mice to clear *S. aureus* bead infections in the presence  
170 or absence of biofilm. In addition to the  $\Delta$ *icaADBC* strain, we tested a strain lacking a  
171 regulator of the *ica* operon, Rbf, which represses the negative regulator of the *ica* operon,  
172 *icaR* (13). Although there were no differences in skin CFUs between wild type,  $\Delta$ *icaADBC*,  
173 or  $\Delta$ *rbf* *S. aureus* at 24 hours post-infection (**Figure 1G**), bacterial clearance at 7 days post-  
174 infection was dependent on *ica*-dependent biofilm formation, as both  $\Delta$ *icaADBC* and  $\Delta$ *rbf*  
175 bead infections were cleared from skin (**Figure 1H**). Complementation of the  $\Delta$ *icaADBC*  
176 operon was not possible as trans-complementation in *S. aureus* with a useable vector in  
177 mice has not yet been developed. By contrast, *S. aureus*  $\Delta$ *agr*, which lacks *agr*-dependent  
178 quorum sensing and secreted virulence factors, did not contribute to bacterial persistence  
179 at 7 days post-infection (**Figure 1I**).

180

181 To test the virulence of biofilm-deficient strains in a systemic challenge, we  
182 administered wild type,  $\Delta$ *icaADCB* or  $\Delta$ *rbf* *S. aureus* i.v. to C57 mice. Mortality and  
183 changes in body weight were unaffected with biofilm-deficient *S. aureus* strains after  
184 systemic infection (**Figure 1J-K**).

185

## 186 **Increased immune infiltration in the absence of biofilm**

187 In our previous work, infection with *S. aureus* embedded beads disrupted the  
188 collagen structure in the subcutaneous fascia which we visualized by second harmonic  
189 generation (SHG), and we identified the infection site by an absence of collagen signal  
190 (23). Identification of the infection site allowed us to quantify immune cell infiltration into  
191 the collagen-free zone using 3D image analysis (**Figure 2A**).

192

193 Although wild type and biofilm-deficient *S. aureus* bead induced similar immune  
194 cell recruitment (**Figure 2B, D**), we observed differences in their localization pattern with  
195 respect to the collagen-free infection site. Whereas 40% of total neutrophils infiltrated in  
196 wild type infections, mice infected with  $\Delta$ *icaADBC* *S. aureus* bead had increased  
197 neutrophil infiltration (60% of total neutrophils) (**Figure 2C**). To see if this was just a  
198 barrier, other cell types should also be able to infiltrate into the infection site. When we  
199 looked at monocytes, they too infiltrated the infection site more effectively in the biofilm  
200 mutants than in the wild type infections suggesting that it is not specific to neutrophils  
201 (**Figure 2E**). Neutrophil elastase (NE) regulated neutrophil infiltration into the infection

202 site at 24 hours as NE<sup>-/-</sup> mice infected with wild type *S. aureus* exhibited significantly less  
203 neutrophil recruitment into the infection site compared to C57 wildtype mice (**Figure 2F-**  
204 **G**).

205

206 Flow cytometry of 24-hour skin infections confirmed that total numbers of Ly6C<sup>int</sup>  
207 Ly6G<sup>+</sup> neutrophils and Ly6G<sup>-</sup> Ly6C<sup>hi</sup> CD64<sup>+</sup> monocyte-derived cells were similar among  
208 wild type,  $\Delta$ *icaADCB* and  $\Delta$ *rbf* strain infected mice (**Figure 3A-C**). Additionally, there  
209 were no obvious differences in neutrophil phenotype at 24 hours post-infection in the  
210 absence of biofilm (**Figure 3D-F**). Neutrophil behaviour was analyzed at 24 hours and  
211 after infection with  $\Delta$ *icaADCB* *S. aureus* bead exposed neutrophils were migrating at  
212 increased velocity compared to neutrophils from wild type infected mice (**Figure 3G,**  
213 **Video S1**). In the absence of biofilm, neutrophils also migrated further distances (20-40  
214  $\mu$ m) compared to neutrophils from wild type infections which migrated less than 20  $\mu$ m  
215 (**Figure 3H**). These data suggest that loss of *S. aureus* MW2 biofilm-linked traits allows  
216 neutrophils to crawl longer distances and infiltrate into the infection to encounter bacteria.

217

## 218 **PNAG biofilm restricts neutrophil migration into the infection** 219 **site to access bacteria**

220 We hypothesized that the biofilm matrix exopolysaccharide hindered neutrophil  
221 migration into the infection site. We imaged Catchup<sup>ivm-red</sup> mice infected with GFP-  
222 expressing *S. aureus* and observed a dark zone defined by the SHG-negative, GFP-negative  
223 and tdTomato-negative area (**Figure 4A**) exactly where the PNAG biofilm matrix was  
224 observed previously within the infection site in wild type infections (**Figure 1C-D**). As we  
225 imaged deeper into the infection site below the collagen surface, the bacterial clusters  
226 became visible, and we observed a dark zone around the wild type bacterial clusters that  
227 was not apparent in biofilm-deficient infections (**Figure 4B-D**). The dark zone area was  
228 significantly reduced in  $\Delta$ *rbf* or  $\Delta$ *icaADCB* infections (**Figure 4E**).

229

230 As we have previously shown that *S. aureus* biofilms can be disrupted by a  
231 glycoside hydrolase enzyme PgaB *in vitro* (22), we next tested whether PgaB treatment *in*  
232 *vivo* would affect neutrophil localization and access to bacteria. Catchup<sup>ivm-red</sup> mice were  
233 infected with GFP-expressing wild type *S. aureus* embedded beads, treated with PgaB or  
234 catalytically inactive enzyme PgaB<sup>D474N</sup> at the time of infection, and imaged at 24 hours  
235 post-infection. The dark zone was apparent in inactive PgaB<sup>D474N</sup> treated mice but absent



236 in active PgaB treated mice (**Figure 4F-G**), suggesting that inhibiting biofilm production  
237 with PgaB allows neutrophils to access the bacteria. Dispersin B (DspB), another enzyme  
238 that hydrolyzes PNAG (22), also gave neutrophils access to bacteria with a reduction in  
239 dark zone area at 24 hours post-infection (**Figure 4H**). As a result of neutrophils accessing  
240 bacteria, PgaB enzyme treatment, both at the time of infection (**Figure 4I**) or  
241 therapeutically at 24 hours post-infection (**Figure 4J**), significantly reduced bacterial  
242 burden at 7 days post-infection.

243

244

## 245 **Discussion**

246

247 These data show that the PNAG biofilm matrix produced by proteins encoded by  
248 the *icaADBC* operon is critical for *S. aureus* persistence in a foreign-body skin infection  
249 model. Imaging the early innate immune response at 24 hours post-infection revealed that  
250 immune infiltration into the infection site was hindered in the presence of biofilm which  
251 can be therapeutically targeted using the glycoside hydrolase enzyme PgaB. This work is  
252 promising for the development of new targeted therapies for foreign-body associated  
253 infections with *S. aureus*.

254

255 *S. aureus* readily forms biofilm on foreign body surfaces or host tissues. This is a  
256 major cause of chronic infections in humans (1). Despite decades of research on bacterial  
257 biofilms, most studies are limited to *in vitro* models which do not reflect what happens *in*  
258 *vivo* (30). Using *in vivo* intravital microscopy on living mice during a foreign body biofilm  
259 infection, we were able to image not only the biofilm *in vivo*, but also the dynamic host  
260 immune response to *in vivo* biofilm infection. Our lab had previously used a foreign-body  
261 infection model with *S. aureus*-laden agar beads but at high concentrations of bacteria  
262 ( $\sim 10^6$  CFU/bead) to study neutrophil recruitment to the *S. aureus* bead (31). We have  
263 adapted this infection model to use low concentrations of *S. aureus* on the agar bead (500  
264 CFU/bead) which serves as a foreign body and in our opinion is more clinically relevant  
265 than the more common high dose planktonic infections.

266

## 267 **Evidence for an *in vivo* biofilm model**

268 Our previous data using bead infection model supported biofilm formation *in vivo*  
269 (23). We know that PIA/PNAG is present in *S. aureus* biofilm matrix which is synthesized  
270 by proteins encoded in the *icaADBC* operon (32), and many clinical isolates of *S. aureus*



271 display high levels of *icaADBC* expression compared to commensal *S. aureus* strains (14,  
272 15). The *S. aureus* strain used in this study, MW2, is also PIA/PNAG<sup>+</sup> and forms *ica*-  
273 dependent biofilm formation *in vivo* (13). In our study, a loss-of-function mutation in  
274 *icaADBC* led to a decreased biofilm phenotype with the absence of PNAG biofilm matrix  
275 in *S. aureus*. The  $\Delta$ *icaADBC* strain was cleared from skin by 7 days post-infection  
276 indicating that PIA/PNAG is critical for *S. aureus* to establish a persistent subcutaneous  
277 infection *in vivo*.

278

279 Our data with the  $\Delta$ *icaADBC* strain was also supported with a *S. aureus*  $\Delta$ *rbf*  
280 mutant. Rbf regulates *S. aureus* biofilm formation *in vitro* (13). A  $\Delta$ *agr* mutant strain is  
281 unable to produce several virulence factors including toxins, phenol soluble modulins, and  
282 protein A (33), yet more biofilm compared to wild type strains (34). Here, deletion of *agr*  
283 in did not affect bacterial persistence at 7 days post-infection and even trended towards  
284 more difficult to eradicate infection.

285

286 In addition to PIA/PNAG, *S. aureus* can produce other biofilm matrix polymers  
287 which include teichoic acids, proteins, and eDNA. These polymers can have a variety of  
288 functions during different stages of biofilm development (5). In addition, the composition  
289 of the polymers within biofilms can vary by strain and foreign body surface (5). Future  
290 directions using this low-dose *S. aureus* bead infection model would be to identify  
291 additional components within the biofilm matrix and determine their functional role during  
292 *in vivo* biofilm infection in skin.

293

## 294 **Neutrophil-biofilm interactions *in vivo***

295 Neutrophil behaviour in close proximity to bacteria within the infection site after  
296 wild type infections and its counterparts lacking *rbf* and *icaADBC* showed striking  
297 differences despite having similar numbers of neutrophils recruited to the infected area.  
298 Neutrophils in the wild type skin infection had reduced motility whereas neutrophil in the  
299 biofilm-deficient strains were more active with higher velocity and further track  
300 displacement. This phenotype was most prominent in *S. aureus* mutant lacking *icaADBC*.  
301 The reduced motility is likely due to the presence of PIA/PNAG biofilm matrix.

302

303 Without labeling for PNAG, a dark zone that was SHG (collagen)-negative, GFP  
304 *S. aureus*-negative, and tdTomato (neutrophil)-negative was apparent which we referred to  
305 as the biofilm. The dark areas observed in *S. aureus* biofilm infections were similar to the  
306 ‘dead zone’ found after *Pseudomonas aeruginosa* biofilm infection in the eye where a  
307 black area devoid of tdTomato<sup>+</sup> neutrophils and GFP bacteria was formed between host  
308 and pathogen (35). We cannot rule out the possibility of other biofilm components such as  
309 proteins or eDNA being present within the dark zone. However, after infecting with *rbf*-  
310 and *icaADBC*-deficient *S. aureus* strains, or treating mice with PgaB, the dark zone was  
311 eliminated suggesting that the PIA biofilm matrix contributed to the formation of the dark  
312 zone.

313

## 314 **Degradation of the biofilm *in vivo***

315 PgaB is a two-domain enzyme produced by the *pgaABCD* operon in *Bordetella*  
316 *bronchiseptica* and *Escherichia coli* species amongst others (7). Its N-terminal domain  
317 exhibits PNAG deacetylase activity while its C-terminal domain has glycoside hydrolase  
318 activity. The enzyme is required for PNAG-dependent biofilm formation (22). In  
319 staphylococcal biofilms, PgaB can disrupt the exopolysaccharide of the biofilm matrix.  
320 Importantly, pathogens who do not produce the PNAG exopolysaccharide are not affected  
321 by glycoside hydrolase activity (36).

322

## 323 **Conclusion**

324 Our work adds to a growing body of work that suggests glycoside hydrolases may  
325 be used therapeutically. Although PgaB has been shown to disrupt staphylococcal biofilm  
326 *in vitro* (22), PgaB has not been used to target *in vivo* biofilms, which makes us the first to  
327 study the *in vivo* effects of this enzyme on the host immune system. In addition to Dispersin  
328 B which has the same enzymatic activity as PgaB, glycoside hydrolases from other bacteria  
329 such as *P. aeruginosa* and *Aspergillus* have also shown therapeutic potential in *in vivo*  
330 infection models (37, 38). Finally, a recent systematic survey of bacterial EPS operons  
331 revealed that 288 bacterial species contain the operon that encodes for PIA/PNAG (7),  
332 which suggests not only an evolutionarily conserved mechanism of PIA-mediated biofilm  
333 formation, but points to PgaB as a broadly targeting therapeutic for chronic infections  
334 caused by many different bacterial species. Altogether, this paper demonstrates a role for  
335 *ica*-dependent biofilm formation *in vivo* and a therapeutic angle to target chronic biofilm  
336 infections with glycoside hydrolase enzymes.

## 337 **Materials and Methods**

338

339 **Mice.** Animal experiments were performed with adult male and female 7-8-wk-old mice  
340 and all experimental animal protocols were approved by the University of Calgary  
341 Animal Care Committee and followed guidelines established by the Canadian Council for  
342 Animal Care (protocol number AC19-0138). All mice were housed under specific  
343 pathogen-free conditions and received sterilized rodent chow and water *ad libitum*. Mice  
344 infected longer than 24 hours were housed in a biohazard facility biosafety level 2.  
345 C57BL/6J mice were purchased from The Jackson Laboratory and bred in house. Ly6G-  
346 cre/Ai14 (Catchup<sup>IVM-red</sup>) mice were a kind gift from Matthias Gunzer. We crossed  
347 Catchup<sup>IVM-red</sup> mice to CX3CR1<sup>gfp/gfp</sup> mice to generate Catchup<sup>IVM-red</sup> CX3CR1<sup>gfp/wt</sup>  
348 double reporter mice, as previously described (23).

349

350 ***Staphylococcus aureus.*** *S. aureus* strain USA400 MW2 (Baba et al., 2002) and its  
351 genetically engineered mutant strains were used for every experiment. MW2 WT and MW2  
352  $\Delta$ *rbf* were kindly gifted to us from Dr. Chia Lee (UAMS). Bacteria were grown in Brain  
353 Heart Infusion (BHI) broth medium at 37°C while shaking at 225 rpm. When required,  
354 bacteria were transformed with pCM29 to constitutively express GFP (Pang et al., 2010).  
355 For MW2-GFP growth, chloramphenicol (10 µg/mL) was added for plasmid selection. For  
356 infection, *S. aureus* strains were sub-cultured in BHI medium without antibiotics until late  
357 exponential phase (OD<sub>660</sub> 1.5), washed once with sterile PBS, and resuspended in 1 mL  
358 PBS for bead or planktonic infections.

359

360 **Standard microbiological and molecular biology methods.** All strains and plasmids are  
361 listed in Table S1, and primers in Table S2. All basic microbiological and molecular  
362 procedures were executed according to standard protocols(39). DNA concentrations were  
363 measured using the  $A_{260}/A_{280}$  method with a Nanodrop 2000 Spectrophotometer  
364 (ThermoFisher Scientific). Protein concentrations were determined using the Pierce 660  
365 nm Protein Assay Reagent (ThermoFisher Scientific), which was calibrated using bovine  
366 serum albumin standards. Genomic DNA (gDNA) isolation, plasmid preparation and DNA  
367 gel extraction were performed using nucleotide purification kits purchased from Qiagen or  
368 BioBasics. Phusion DNA polymerase and BP Clonase II were purchased from  
369 ThermoFisher Scientific. Oligonucleotide primers were purchased from Integrated DNA  
370 Technologies. Sanger sequencing was outsourced to UCDNA Services at the University of  
371 Calgary. Lysostaphin, anhydrotetracycline (ATC), chloramphenicol (CHL) and  
372 carbenicillin (CAR) were purchased from Sigma-Aldrich. Antibiotic stock solutions were

373 corrected for activity, filter sterilized, split into 0.5 ml aliquots, and stored at  $-70^{\circ}\text{C}$  until  
374 used.

375

376 **Microbiological media and buffers.** Ultrapure water was used in all buffers and media. It  
377 was prepared in-house using a Milli-Q Direct Water Purification System (Millipore-  
378 Sigma). Phosphate buffered saline (PBS) was purchased as a  $20\times$  concentrate (Amresco).  
379 It was diluted as needed in ultrapure water and then sterilized using an autoclave.  
380 *Escherichia coli* and *S. aureus* strains were routinely propagated in lysogeny broth (LB).  
381 LB was made with 10 g tryptone, 5.0 g yeast extract and 5.0 g NaCl per 1.0 L of ultrapure  
382 water. Semi-solid LB agar in Petri dishes was prepared by adding 15.0 g/L bacteriological  
383 agar to LB prior to autoclaving. *S. aureus* was propagated, as required, in brain-heart  
384 infusion (BHI) broth, tryptic soy broth (TSB), or tryptic soy agar (TSA) purchased from  
385 BD Difco and prepared according to manufacturer's directions in ultrapure water. As  
386 required, antibiotics and/or ATC were added as follows to media for selection during  
387 genetic manipulations: for *E. coli*, CAR at  $50\ \mu\text{g ml}^{-1}$ , and CHL at  $25\ \mu\text{g ml}^{-1}$ ; for *S. aureus*  
388 MW2: CHL at  $10\ \mu\text{g ml}^{-1}$ , and ATC at  $0.50\ \mu\text{g ml}^{-1}$ . All strains were stored at  $-70^{\circ}\text{C}$  in  
389 LB containing 16.7% glycerol.

390

391 **Construction of allelic exchange vectors and *S. aureus* deletion mutants.** An in-frame  
392 deletion mutation in *icaADBC* was engineered in *S. aureus* MW2 using established  
393 protocols for two-step allelic exchange(40), but with some modifications. Briefly, primer  
394 pairs oTER334/oTER345 and oTER338/oTER344 were used to amplify DNA regions  
395 upstream and downstream of *icaA* and *icaC*, respectively. These PCR products were gel  
396 purified and then fused together using established protocols(41) for splicing-by-overlap-  
397 extension (SOE) PCR with primers oTER334 and oTER344, which had been tailed with  
398 *attB1* and *attB2* sequences, respectively. The SOE-PCR product was gel purified and then  
399 recombined with pKOR1 using BP Clonase II. This reaction mixture was transformed into  
400 *E. coli* DH5 $\alpha$  via electroporation, plated onto LB + CAR agar, and incubated overnight at  
401  $30^{\circ}\text{C}$ . Clones bearing the desired insert were identified via established protocols for colony  
402 PCR with M13F and M13R primers (oJH367 and oJH368, respectively, Table S2)(41,  
403 42). The resulting allelic exchange vector, pKOR1:: *$\Delta$ icaABDC* (pTER139, Table S1) was  
404 verified by Sanger sequencing using M13F and M13R primers.

405 The pTER139 plasmid was transformed into *E. coli* DC10B, outgrown, selected,  
406 and purified using standard methods to ensure restriction modification system  
407 compatibility(43) with *S. aureus* MW2. Subsequently,  $5\ \mu\text{g}$  pTER139 was electroporated  
408 into *S. aureus* MW2 via established protocols(43). Merodiploids were selected on TSA +

409 CHL after 24 h incubation at 30 °C. Subsequently, several propagations were necessary to  
410 cure the pKOR1-derived allelic exchange vector. Here, 2-3 colonies were picked from  
411 these plates and transferred to 5 mL TSB + CHL and incubated overnight at 30 °C and 250  
412 RPM; 5 µl of this culture was then transferred to 5 mL TSB + CHL, incubated for 24 h at  
413 42 °C and 250 RPM. This culture was serially diluted and spread onto TSA + CHL and  
414 incubated at 42 °C. Merodiploid colonies were collected with a sterile swab and transferred  
415 to 5 ml TSB and incubated overnight at 37 °C and 250 RPM, and then serially diluted and  
416 spread on TSA + ATC for counterselection. Colonies were picked from these plates and  
417 spotted on TSA and TSA + CHL. Colony PCR using phenol extraction of *S. aureus*  
418 gDNA(44) from CHL-sensitive colonies was used to identify the  $\Delta$ *icaADBC* mutant using  
419 primers oTER423 and oTER382 (Table S2). The deletion mutation was confirmed via  
420 Sanger sequencing of this PCR product using the same primers, yielding *S. aureus* TER49  
421 (Table S1).

422

423

424 ***S. aureus* agar bead preparation.** *S. aureus*-inoculated agar beads were used to model a  
425 foreign-body infection, as previously described (23). Bacteria were resuspended in 1mL  
426 PBS, adjusted to an OD<sub>660</sub> of 0.100, then diluted 10-fold. 250 µL of bacteria suspension  
427 was then added to 2.25 mL of freshly autoclaved, warm, liquid 1.5% BHI agar. The agar-  
428 bacteria mixture was slowly dropped into 40 mL ice-cold mineral oil solution containing  
429 400 µL Tween 20 to prevent bead clumping. Gentle stirring for 15 minutes in an ice bath  
430 yielded spherical *S. aureus* agar beads. From there, beads were washed with sterile PBS by  
431 spinning in a centrifuge at 2000 rpm for 10 minutes. This wash step was repeated up to  
432 eight times to remove mineral oil coating the beads. Beads were stored at 4°C for up to two  
433 days, and fresh beads were made before every experiment. Validation of *S. aureus* bead  
434 concentrations of every bead batch were confirmed by mechanical disruption three times  
435 with a 30 gauge insulin syringe in 1 mL sterile PBS. 50 µL of the bead solution was plated  
436 onto BHI agar plates and grown overnight at 37°C for enumeration of CFUs. The average  
437 of four beads determined the bead concentration of the batch.

438

439 **Infection model – *S. aureus* agar beads.** For bead infections, mice were anesthetized with  
440 isoflurane gas, back hair was shaved, and hair was chemically removed with Nair hair  
441 removal cream. Nair cream was washed off with water and skin was dried with a gauze  
442 pad. Mice were tattooed with green animal tattoo ink to permanently mark the infection  
443 site. A single bead was picked up with forceps and placed onto the bore of an 18 gauge  
444 needle connected to a syringe containing 50 µL sterile PBS, and the bead was moved back

445 by gentle pull of the syringe which moved the bead into the needle tip. The bead was  
446 injected subcutaneously into the dorsal flank skin within the tattooed region.

447

448 **Infection model – bloodstream *S. aureus* infection.** Bacterial strains were grown in 3 mL  
449 BHI overnight at 37°C while shaking. Subcultures of 150 µL bacteria in 3 mL BHI were  
450 grown for 2 hours at 37°C. 1 mL of subculture was spun down and resuspended in sterile  
451 saline and adjusted to 5x10<sup>8</sup> CFU/mL. Mice were injected intravenously with 200 µL of  
452 bacteria (1x10<sup>8</sup> CFU inoculum) of either *S. aureus* MW2 WT,  $\Delta rbf$ , or  $\Delta icaADBC$ . Infected  
453 mice were regularly monitored for weight and illness behaviours. Euthanasia was  
454 performed when the humane endpoint was reached (20% weight loss) or clinical signs of  
455 severe systemic illness were observed.

456

#### 457 **Antibodies**

458 Antibodies used for flow cytometry were purchased from eBioscience, BioLegend or BD  
459 Biosciences. Dead cells were excluded by a fixable viability dye (Ghost Red 710, Tonbo  
460 Biosciences, 1:6400). The following antibodies were used for flow cytometry:

461

| Reagent                                           | Source     | Identifier      |
|---------------------------------------------------|------------|-----------------|
| Anti-mouse CD45 BV510 (clone 30-F11)              | BioLegend  | Cat# 103138     |
| Anti-mouse Ly6G BV650 (clone 1A8)                 | BD         | Cat# 740554     |
| Anti-mouse CD11b BV750 (clone M1/70)              | BioLegend  | Cat# 101267     |
| Anti-mouse Ly6C PerCP Cy5.5 (clone HK1.4)         | BioLegend  | Cat# 129012     |
| Anti-mouse CD64 Alexa Fluor 647 (clone X54-5/7.1) | BD         | Cat# 558539     |
| Anti-mouse CD182 (CXCR2) BUV563 (clone V48-2310)  | BD         | Cat# 748681     |
| Anti-mouse CD184 (CXCR4) BUV615 (clone 2B11)      | BD         | Cat# 752552     |
| Anti-mouse Siglec-F BUV737 (clone 1RNM44N)        | BD         | Cat# 750024     |
| Anti-mouse CD117 APC (clone 2B8)                  | BioLegend  | Cat# 105812     |
| Anti-mouse CD49d FITC (clone R1-2)                | BioLegend  | Cat# 103606     |
| Anti-mouse CD62L BV605 (clone C068C2)             | BioLegend  | Cat# 104438     |
| Anti-mouse CD54 PE (clone YN1/1.7.4)              | BioLegend  | Cat# 116108     |
| Anti-mouse CD101 PE-Cy7 (clone Moushi101)         | Invitrogen | Cat# 12-1011-82 |

462



## 463 **Skin Imaging**

464 Mice were anesthetized (ketamine (200 mg/kg) and xylazine (10 mg/kg) intraperitoneally)  
465 and a jugular catheter was inserted as previously described (McDonald et al., 2010).  
466 Anesthetics were administered through the intravenous catheter at regular intervals to  
467 maintain the mouse in a surgical plane of anesthesia. The skin surgical procedure was  
468 performed as previously described (Yipp et al., 2012). Briefly, mice were placed on a  
469 heating pad (World Precision Instruments) maintained at 37° C. A midline incision was  
470 made on the dorsal side of the mouse and the dorsal side of the flank skin was exposed and  
471 secured using silk stay-sutures onto a skin prep board (3D-printed in house). A superfusion  
472 system was set up with Hank's Balanced Salt Solution (HBSS) heated to 37° C to perfuse  
473 the exposed skin tissue at a flow rate of 0.05. A cover glass was placed on top of the  
474 exposed skin for imaging.

475

## 476 **Resonant Scanning Multiphoton Intravital Microscopy**

477 Intravital image acquisition of the skin was performed with an upright Leica SP8 resonant  
478 scanning multiphoton microscope equipped with a 20X 0.95 NA water objective. A tunable  
479 multiphoton laser was set to 940nm for excitation of GFP, tdTomato and qTracker655 for  
480 blood vessels. Second harmonic generation was visualized at an emission of 470nm.  
481 External hybrid detectors were used to detect emission at 620-680 nm (HyD-RLD1), 565-  
482 620nm (HyD-RLD2), 495-565 nm (HyD-RLD3) and <495 nm (HyD-RLD4). For 3D time  
483 lapse videos, three fields of view were selected within the infection area at 50 µm z-stack  
484 with 5 µm z-step size. Intervals were set to 30.0 seconds and videos were acquired over 20  
485 minutes. After videos were acquired, two-three 3D regions were imaged to capture the  
486 infection area at the following dimensions: 2x5 tile scan at 200 µm z-stack with 5 µm z-  
487 step size. All videos and images used a line averaging of 16.

## 488 **Image processing, analysis and quantification**

489 Raw imaging data was processed and quantified using Imaris Bitplane version 9.5. A  
490 Gaussian filter and background subtraction was applied to all images. A MATLAB  
491 XTension "Channel Arithmetics" was run to subtract GFP signal from (Ch2[neutrophils]-  
492 Ch3[*S. aureus* GFP]). 3D surface models of collagen were generated in Imaris using default  
493 parameters. Imaris spot function was used for automated cell counting using default  
494 parameters, and then all spots were filtered by volume to exclude spots < 5 µm<sup>3</sup>. For  
495 quantification of neutrophil and monocyte infiltration, a 25 µm z-stack was cropped at the  
496 focal plane of the infection site, a mask was applied to the collagen surface, then an  
497 intensity max filter was applied to neutrophil (tdTomato<sup>+</sup>) or monocyte (GFP<sup>+</sup>) spots as



498 collagen mask<sup>+</sup> or collagen mask<sup>-</sup>. For quantification of immune cell track length and  
499 velocity, tdTomato<sup>+</sup> spots were tracked with Brownian motion over the 10-minute video  
500 and position XYZ coordinates were exported, and added into Rstudio where the data were  
501 quantified using an R script for generation of the spider plots and velocity measurements.  
502 For quantification of the dark zone in biofilm infections, a 2D region was cropped at the  
503 infection site, and the sum of collagen area, neutrophil area and GFP bacteria area was  
504 subtracted from the total region area. For overlapping areas, a mask was applied, and a new  
505 channel was duplicated such that any signal inside the mask was set to zero to ensure that  
506 the overlapping areas were not duplicated.

507

## 508 **CFU Experiments**

509 Skin infections (1 cm<sup>2</sup> biopsy of full thickness skin) were collected at different time points,  
510 homogenised in PBS and serial dilutions were plated on BHI agar plates and colonies were  
511 counted after 18 h at 37°C.

512

## 513 **Flow cytometry**

514 Skin biopsies of the infected area were harvested (1 cm<sup>2</sup> section) and collected into cold  
515 HBSS. Skin tissue was digested as previously described (23). Skin tissue was incubated at  
516 37°C with gentle rotation for 75 minutes in 2 mL of HBSS containing 3% FBS, 5 mM  
517 EDTA and 0.8 mg/mL collagenase II (Worthington). Following enzymatic digestion tissue  
518 was passed through a 70 µm filter and washed with HBSS containing 3% FBS and 5 mM  
519 EDTA. A debris removal step was performed as per manufacturer protocol in the debris  
520 removal kit (Miltenyi Biotech). Single cells were resuspended in 800 µL of HBSS  
521 containing 3% FBS and 5 mM EDTA and 200 µL was used for antibody staining. Blood  
522 was obtained by intra-cardiac collection from anesthetized mice and 50 µL of blood lysed  
523 with ACK lysing buffer. Cells were first stained with Fc blocking antibody (1:200) and  
524 Ghost Red 710 fixable viability dye (1:6400) in HBSS for 30 minutes on ice. CXCR4  
525 antibody staining was done at 37°C for 20 minutes. Next, cell suspensions were stained for  
526 remaining surface antigens in HBSS supplemented with 3% FBS and 5 mM EDTA for 20  
527 minutes on ice. After washing with HBSS containing 3% FBS and 5 mM EDTA, cells were  
528 fixed with 1% paraformaldehyde in HBSS for 15 minutes on ice and then run the following  
529 day on the Cyttek spectral cytometer. All flow cytometry experiments were analyzed with  
530 FlowJo v10 (Tree Star).

531

### 532 **In vivo enzyme treatment for biofilm disruption**

533 A PgaB ortholog of *Bordetella bronchiseptica* (PgaB<sub>Bb</sub>) that only contained the C-terminus  
534 of PgaB was shown to have effective glycoside hydrolase activity comparable to other  
535 enzymes such as dispersin B (Little et al., 2018), and this was the enzyme used in this work.  
536 The biofilm-disrupting enzyme, PgaB, or mutant, nonfunctional enzyme PgaB D474N  
537 were injected subcutaneously into the mouse flank skin at the time of infection with the *S.*  
538 *aureus* bead. For PgaB and PgaB D474N, 0.4 mg/mouse was injected in a 50 µL volume.

539

### 540 **Whole mount 3D multiphoton microscopy**

541 Skin samples were harvested from mice and fixed in 4% PFA for 48 hours at 4°C. Samples  
542 were then washed 3 times in 1% PBS for 1 hour at 4 °C, shaking and left in 1% BSA 1%  
543 Triton X-100 PBS overnight in 4%, shaking. Tissues were then stained with rabbit anti-  
544 S100a9 antibody (Abcam, 1:500) and chicken anti-GFP antibody (AvesLabs, 1:200) in 1%  
545 Triton X-100 and 1% BSA PBS for 3 days 4 °C, shaking. Next, the samples were washed  
546 and stained with secondary antibodies (1:1000) for 2 days 4 °C, shaking. The tissues were  
547 washed and mounted onto a glass coverslip and imaged using an Leica SP8 multiphoton  
548 microscope.

549

### 550 **Scanning Electron Microscopy**

551 Skin infections were harvested and immediately fixed in 3% glutaraldehyde and  
552 paraformaldehyde for 2 hours. Samples were dehydrated in increasing concentrations of  
553 ethanol (30, 50, 70, 80, 90, and 100%), 10 minutes for each wash. Samples were transferred  
554 to hexamethyldisilazane for 1 hour and air dried overnight. Samples were sputter coated  
555 with 10nm platinum prior to imaging. SEM imaging was done on the XL30 30 kV  
556 Scanning electron microscope.

557

### 558 **Semi-quantitative PNAG dot blots**

559 Dot blots for PNAG were executed by protocols modified from those previously described  
560 by our groups to measure *P. aeruginosa* PSL (Harrison et al., 2020). Here, *S. aureus* strains  
561 were grown overnight on tryptic soy agar (TSA) at 37 °C. Subsequently, single colonies  
562 were picked from the agar with a sterile loop, transferred to 2 mL tryptic soy broth (TSB)  
563 containing 1% glucose, and incubated overnight at 37 °C and 250 RPM. Cell pellets were

564 collected from 1 mL of each culture by centrifugation (21,000 RCF for 2 min), and the  
565 supernatant discarded. The cells were suspended in 250  $\mu$ L of 0.5 M EDTA (pH 8.0), and  
566 boiled at 100 °C for 60 min. These boiled suspensions were again centrifuged (21,000 RCF  
567 for 10 min), and 220  $\mu$ L of supernatant was transferred to a new tube. Protein  
568 concentrations were measured for each sample using the A280 NanoDrop method and a  
569 protein standard curve (ThermoFisher Cat. 23208). Afterwards, 10  $\mu$ L of proteinase K was  
570 added to each sample, and the samples were incubated at 56 °C for 30 min, followed by a  
571 100 °C incubation for 15 min to inactivate proteinase K. These samples were diluted to  
572 3000, 1500, and 750 ng/ $\mu$ L, and stored at -20 °C.

573

574 Frozen samples were thawed and then boiled at 100 °C for 5 min. A 2  $\mu$ L aliquot for each  
575 sample was spotted in technical triplicate onto nitrocellulose membranes. The membrane  
576 was air dried and then rinsed in TRIS-buffered saline containing 0.5% w/v Tween-20  
577 (TBS-T). Blots were blocked with TBS-T containing 5% w/v skim milk powder for 30  
578 min, which were placed at room temperature on orbital shaker at 100 RPM. Afterwards,  
579 the blocking buffer was replaced with TBS-T + 5% w/v skim milk powder containing the  
580 human- $\alpha$ -PNAG antibody (Kelly-Quintos, Cavacini, Posner, Goldmann, & Pier, 2006) at  
581 a 1:1000 dilution. The blot was then incubated at room temperature on the orbital shaker  
582 for 1 h, and then rinsed 3 times with TBS-T (3  $\times$  10 min, on the orbital shaker).  
583 Subsequently, the blot was labelled with horse-radish peroxidase (HRP) conjugated goat  
584 anti-human IgG antibody (Invitrogen, catalog number 31410) using a 1:3333 dilution in  
585 TBS-T. The blot was then incubated at room temperature on the orbital shaker for 1 h, and  
586 then rinsed 3 times with TBS-T (3  $\times$  10 min, on the orbital shaker). Subsequently, the blot  
587 was labelled with horse-radish peroxidase (HRP) conjugated goat anti-human IgG antibody  
588 (Invitrogen, catalog number 31410) using a 1:3333 dilution in TBS-T. The blot was again  
589 incubated at room temperature on the orbital shaker for 1 h, and then rinsed 3 times with  
590 TBS-T as described above. Finally, the HRP-conjugated secondary antibody was  
591 visualized with Super Signal West Dura Extended Duration Substrate (ThermoFisher  
592 Scientific®) and imaged using the FluorChemQ gel documentation system  
593 (Proteinsimple®). Images were captured and analyzed using Alphaview (v3.4.0) software  
594 (Proteinsimple®). Analysis was executed in biological and technical triplicate. Each  
595 sample was run in technical triplicate. One biological replicate was run per blot, 3  
596 biological replicates were tested.

597

598 ***In vitro* biofilm assay**

599 *S. aureus* MW2 WT or  $\Delta$ *icaADCB* was grown in TSB medium containing 0.125% glucose  
600 for 24 hours and biofilms were stained with 0.1% crystal violet using two different *in vitro*  
601 biofilm assays: the Minimum Biofilm Eradication Concentration (MBEC) assay utilizing  
602 the Calgary Biofilm Device, as previously described (Ceri et al., 1999; Harrison et al.,  
603 2010) and the microplate biofilm assay (O'Toole, 2011).

604

605 **Statistical analysis and experimental design**

606 In most experiments sample size was determined based on previous studies within the lab  
607 using these techniques. For intravital microscopy, we were limited by imaging only one  
608 mouse at a time so a minimum of 1 experimental mouse and 1 control mouse was imaged  
609 per day. Sample size was determined based on prior studies and literature using similar  
610 experimental paradigms. In instances where the approach had not previously been used, a  
611 minimum of 4 animals/group were utilized. All experiments were replicated at least once  
612 with similar findings and all replications were successful. For all experiments that required  
613 either pharmacological treatment or different infection conditions, mice were randomized.  
614 The investigators were not blinded during experiments because treatments and data  
615 collection were performed by the same researcher. For image analysis, the images were  
616 randomly assigned a key by the researcher and all images were processed using the same  
617 workflow, therefore, image analysis was blinded after data collection.

618

619 Statistical analyses were performed using Prism 9 (Graphpad Software Inc., v9.1.1, La  
620 Jolla, CA). Statistical tests are described for each figure in the figure legend. A normality  
621 test was performed for all data to determine whether a parametric or non-parametric  
622 statistical test would be used. A *P* value < 0.05 was considered statistically significant.

623

624

625 **Acknowledgments:**

626 The authors thank T. Nussbaumer for mice husbandry and genotyping, Dr. R. Gamutin for  
627 monitoring infected mice in the University of Calgary biohazard animal facility, Dr. P.  
628 Colarusso, Dr. A. Chojnacki, and Dr. L. Swift at the University of Calgary Live Cell  
629 Imaging Facility for microscope usage and image analysis support, Dr. J. Zindel for  
630 providing the R scripts for image analysis, Dr. W.Y. Lee for microscope assistance and  
631 maintenance and assistance with experiments, Dr. H. Kuipers for use of the Cytex Aurora

632 which was funded through the Canadian Foundation for Innovation, Dr. P. Mukherjee and  
633 the Microscopy and Imaging Facility at the University of Calgary for scanning electron  
634 microscopy assistance, and Dr. C. Lee for providing the *S. aureus* MW2 WT and MW2  
635  $\Delta rbf$  strains for our work. R.M.K. was supported by the Alberta Graduate Excellence  
636 Scholarship and the University of Calgary Doctoral Scholarship. J.C. was supported by  
637 from the Margaret Gunn Endowment for Animal Health Research. This work was  
638 supported by foundation grants from the Canadian Institute of Health Research  
639 (FDN143248 to P.K., FDN154327 to P.L.H.) and CIHR Project Grant and Tier II Canada  
640 Research Chair to J.J.H; P.L.H. was supported by the Tier I Canada Research Chair (2006-  
641 2020).

642

#### 643 **Author contributions:**

644 R.M.K. and P.K. designed experiments. R.M.K., performed experiments. Specifically,  
645 R.M.K. performed all experiments except for T.R. who generated the  $\Delta icaADBC$  strain  
646 and performed the dot blot experiment (Fig. 1D), J.H. performed systemic *S. aureus*  
647 infections (Fig. S2 A-B), R.S. who assisted in the generation of knockout strains, and J.C.  
648 who performed the in vitro biofilm assay (Fig. S1). R.M.K. analyzed all data. D.R. and  
649 L.H. provided the PgaB, PgaB<sup>D474N</sup>, and DspB enzymes, G.P. provided the F598 mAb to  
650 PNAG, D.W.M. supervised the in vitro biofilm assay, J.J.H. supervised the generation of  
651 the  $\Delta icaADBC$  strain and provided project insight and critical review of the paper. R.M.K.  
652 wrote the paper with input from all co-authors. All authors read and approved the  
653 manuscript for submission. P.K. supervised this study.

654

#### 655 **Competing interests:**

656 G. B. Pier is an inventor of intellectual properties [human monoclonal antibody to PNAG  
657 and PNAG vaccines] that are licensed by Brigham and Women's Hospital to Alopexx, Inc.,  
658 an entity in which GBP also holds equity. As an inventor of intellectual properties, GBP  
659 also has the right to receive a share of licensing-related income (royalties, fees) through  
660 Brigham and Women's Hospital from Alopexx, Inc. GBP's interests were reviewed and  
661 are managed by the Brigham and Women's Hospital and Mass General Brigham in  
662 accordance with their conflict of interest policies.

663

664

## 665 References

666

- 667 1. Costerton JW, Stewart PS, Greenberg EP. Bacterial biofilms: a common cause of  
668 persistent infections. *Science*. 1999;284(5418):1318-22.
- 669 2. Senthil S, Munro JT, Pitto RP. Infection in total hip replacement: meta-analysis.  
670 *Int Orthop*. 2011;35(2):253-60.
- 671 3. Paharik AE, Horswill AR. The staphylococcal biofilm: Adhesins, regulation, and  
672 host response. *Microbiol Spectr*. 2016;4(2).
- 673 4. Pettygrove BA, Kratochvil RM, Alhede M, Jensen PO, Newton M, Qvortrup K, et  
674 al. Delayed neutrophil recruitment allows nascent *Staphylococcus aureus* biofilm  
675 formation and immune evasion. *Biomaterials*. 2021;275:120775.
- 676 5. Schilcher K, Horswill AR. Staphylococcal Biofilm Development: Structure,  
677 Regulation, and Treatment Strategies. *Microbiol Mol Biol Rev*. 2020;84(3).
- 678 6. Poulin MB, Kuperman LL. Regulation of biofilm exopolysaccharide production  
679 by cyclic di-guanosine monophosphate. *Front Microbiol*. 2021;12.
- 680 7. Bundalovic-Torma C, Whitfield GB, Marmont LS, Howell PL, Parkinson J. A  
681 systematic pipeline for classifying bacterial operons reveals the evolutionary landscape of  
682 biofilm machineries. *PLoS Comput Biol*. 2020;16(4):e1007721.
- 683 8. Joo H-S, Otto M. Molecular basis of in vivo biofilm formation by bacterial  
684 pathogens. *Chem Biol*. 2012;19(12):1503-13.
- 685 9. O'Gara JP. *ica* and beyond: biofilm mechanisms and regulation in *Staphylococcus*  
686 *epidermidis* and *Staphylococcus aureus*. *FEMS Microbiol Immunol*. 2007;270(2):179-88.
- 687 10. Pokrovskaya V, Poloczek J, Little DJ, Griffiths H, Howell PL, Nitz M. Functional  
688 Characterization of *Staphylococcus epidermidis* IcaB, a De-N-acetylase Important for  
689 Biofilm Formation. *Biochemistry*. 2013;52(32):5463-71.
- 690 11. Heilmann C, Schweitzer O, Gerke C, Vanittanakom N, Mack D, Götz F.  
691 Molecular basis of intercellular adhesion in the biofilm-forming *Staphylococcus*  
692 *epidermidis*. *Mol Microbiol*. 1996;20(5):1083-91.
- 693 12. Cramton SE, Gerke C, Schnell NF, Nichols WW, Götz F. The intercellular  
694 adhesion (*ica*) locus is present in *Staphylococcus aureus* and is required for biofilm  
695 formation. *Infect Immun*. 1999;67(10):5427-33.
- 696 13. Cue D, Lei MG, Luong TT, Kuechenmeister L, Dunman PM, O'Donnell S, et al.  
697 Rbf promotes biofilm formation by *Staphylococcus aureus* via repression of *icaR*, a  
698 negative regulator of *icaADBC*. *J Bacteriol*. 2009;191(20):6363-73.
- 699 14. Peacock SJ, Moore CE, Justice A, Kantzanou M, Story L, Mackie K, et al.  
700 Virulent combinations of adhesin and toxin genes in natural populations of  
701 *Staphylococcus aureus*. *Infect Immun*. 2002;70(9):4987-96.
- 702 15. Kropec A, Maira-Litran T, Jefferson KK, Grout M, Cramton SE, Gotz F, et al.  
703 Poly-N-acetylglucosamine production in *Staphylococcus aureus* is essential for virulence  
704 in murine models of systemic infection. *Infect Immun*. 2005;73(10):6868-76.
- 705 16. Lin MH, Shu JC, Lin LP, Chong KY, Cheng YW, Du JF, et al. Elucidating the  
706 crucial role of poly N-acetylglucosamine from *Staphylococcus aureus* in cellular  
707 adhesion and pathogenesis. *PLoS One*. 2015;10(4):e0124216.



- 708 17. Kaplan JB. Therapeutic Potential of Biofilm-Dispersing Enzymes. The  
709 International Journal of Artificial Organs. 2009;32(9):545-54.
- 710 18. Fleming D, Chahin L, Rumbaugh K. Glycoside Hydrolases Degrade  
711 Polymicrobial Bacterial Biofilms in Wounds. Antimicrob Agents Chemother. 2017;61(2).
- 712 19. Redman WK, Welch GS, Rumbaugh KP. Differential Efficacy of Glycoside  
713 Hydrolases to Disperse Biofilms. Frontiers in Cellular and Infection Microbiology.  
714 2020;10.
- 715 20. Kaplan JB, Rangunath C, Ramasubbu N, Fine DH. Detachment of *Actinobacillus*  
716 *actinomycetemcomitans* biofilm cells by an endogenous  $\beta$ -hexosaminidase activity.  
717 Journal of bacteriology. 2003;185(16):4693-8.
- 718 21. Darouiche RO, Mansouri MD, Gawande PV, Madhyastha S. Antimicrobial and  
719 antibiofilm efficacy of triclosan and DispersinB® combination. Journal of Antimicrobial  
720 Chemotherapy. 2009;64(1):88-93.
- 721 22. Little DJ, Pfoh R, Le Mauff F, Bamford NC, Notte C, Baker P, et al. PgaB  
722 orthologues contain a glycoside hydrolase domain that cleaves deacetylated poly-  
723 beta(1,6)-N-acetylglucosamine and can disrupt bacterial biofilms. PLoS Pathog.  
724 2018;14(4):e1006998.
- 725 23. Kratofil RM, Shim HB, Shim R, Lee WY, Labit E, Sinha S, et al. A monocyte-  
726 leptin-angiogenesis pathway critical for repair post-infection. Nature. 2022.
- 727 24. Baba T, Takeuchi F, Kuroda M, Yuzawa H, Aoki K, Oguchi A, et al. Genome and  
728 virulence determinants of high virulence community-acquired MRSA. Lancet.  
729 2002;359(9320):1819-27.
- 730 25. Marrie TJ, Costerton JW. Scanning and transmission electron microscopy of in  
731 situ bacterial colonization of intravenous and intraarterial catheters. Journal of Clinical  
732 Microbiology. 1984;19(5):687-93.
- 733 26. Ceri H, Olson ME, Stremick C, Read RR, Morck D, Buret A. The Calgary  
734 Biofilm Device: new technology for rapid determination of antibiotic susceptibilities of  
735 bacterial biofilms. J Clin Microbiol. 1999;37(6):1771-6.
- 736 27. Harrison JJ, Stremick CA, Turner RJ, Allan ND, Olson ME, Ceri H. Microtiter  
737 susceptibility testing of microbes growing on peg lids: a miniaturized biofilm model for  
738 high-throughput screening. Nat Protoc. 2010;5(7):1236-54.
- 739 28. O'Toole GA. Microtiter dish biofilm formation assay. J Vis Exp. 2011(47).
- 740 29. Kelly-Quintos C, Cavacini LA, Posner MR, Goldmann D, Pier GB.  
741 Characterization of the opsonic and protective activity against *Staphylococcus aureus* of  
742 fully human monoclonal antibodies specific for the bacterial surface polysaccharide poly-  
743 N-acetylglucosamine. Infect Immun. 2006;74(5):2742-50.
- 744 30. Bjarnsholt T, Alhede M, Alhede M, Eickhardt-Sørensen SR, Moser C, Kühl M, et  
745 al. The in vivo biofilm. Trends Microbiol. 2013;21(9):466-74.
- 746 31. Harding MG, Zhang K, Conly J, Kubes P. Neutrophil crawling in capillaries; a  
747 novel immune response to *Staphylococcus aureus*. PLoS Pathog. 2014;10(10):e1004379.
- 748 32. Nguyen HTT, Nguyen TH, Otto M. The staphylococcal exopolysaccharide PIA -  
749 Biosynthesis and role in biofilm formation, colonization, and infection. Comput Struct  
750 Biotechnol J. 2020;18:3324-34.
- 751 33. Kong K-F, Vuong C, Otto M. *Staphylococcus* quorum sensing in biofilm  
752 formation and infection. Int J Med Microbiol. 2006;296(2):133-9.



- 753 34. Vuong C, Saenz HL, Götz F, Otto M. Impact of the *agr* quorum-sensing system  
754 on adherence to polystyrene in *Staphylococcus aureus*. J Infect Dis. 2000;182(6):1688-  
755 93.
- 756 35. Thanabalasuriar A, Scott BNV, Peiseler M, Willson ME, Zeng Z, Warrener P, et  
757 al. Neutrophil extracellular traps confine *Pseudomonas aeruginosa* ocular biofilms and  
758 restrict brain invasion. Cell Host Microbe. 2019;25(4):526-36 e4.
- 759 36. Wang S, Breslawec AP, Alvarez E, Tyrlik M, Li C, Poulin MB. Differential  
760 Recognition of Deacetylated PNAG Oligosaccharides by a Biofilm Degrading  
761 Glycosidase. ACS Chemical Biology. 2019;14(9):1998-2005.
- 762 37. Yu S, Su T, Wu H, Liu S, Wang D, Zhao T, et al. PslG, a self-produced glycosyl  
763 hydrolase, triggers biofilm disassembly by disrupting exopolysaccharide matrix. Cell  
764 Research. 2015;25(12):1352-67.
- 765 38. Snarr BD, Baker P, Bamford NC, Sato Y, Liu H, Lehoux M, et al. Microbial  
766 glycoside hydrolases as antibiofilm agents with cross-kingdom activity. Proceedings of  
767 the National Academy of Sciences. 2017;114(27):7124-9.
- 768 39. Green MR, Sambrook J. Molecular cloning: A laboratory manual. Cold Spring  
769 Harbor, New York: Cold Spring Harbor Laboratory Press; 2012.
- 770 40. Bae T, Schneewind O. Allelic replacement in *Staphylococcus aureus* with  
771 inducible counter-selection. Plasmid. 2006;55(1):58-63.
- 772 41. Hmelo LR, Borlee BR, Almblad H, Love ME, Randall TE, Tseng BS, et al.  
773 Precision-engineering the *Pseudomonas aeruginosa* genome with two-step allelic  
774 exchange. Nat Protoc. 2015;10(11):1820-41.
- 775 42. Harrison JJ, Almblad H, Irie Y, Wolter DJ, Eggleston HC, Randall TE, et al.  
776 Elevated exopolysaccharide levels in *Pseudomonas aeruginosa* flagellar mutants have  
777 implications for biofilm growth and chronic infections. PLoS Genetics.  
778 2020;16(6):e1008848.
- 779 43. Monk Ian R, Shah Ishita M, Xu M, Tan M-W, Foster Timothy J. Transforming  
780 the untransformable: Application of direct transformation to manipulate genetically  
781 *Staphylococcus aureus* and *Staphylococcus epidermidis*. mBio. 2012;3(2):e00277-11.
- 782 44. Papakyriacou H, Vaz D, Simor A, Louie M, McGavin MJ. Molecular analysis of  
783 the accessory gene regulator (*agr*) locus and balance of virulence factor expression in  
784 epidemic methicillin-resistant *Staphylococcus aureus*. The Journal of Infectious Diseases.  
785 2000;181(3):990-1000.

786  
787

788 **Figures and Tables**  
789

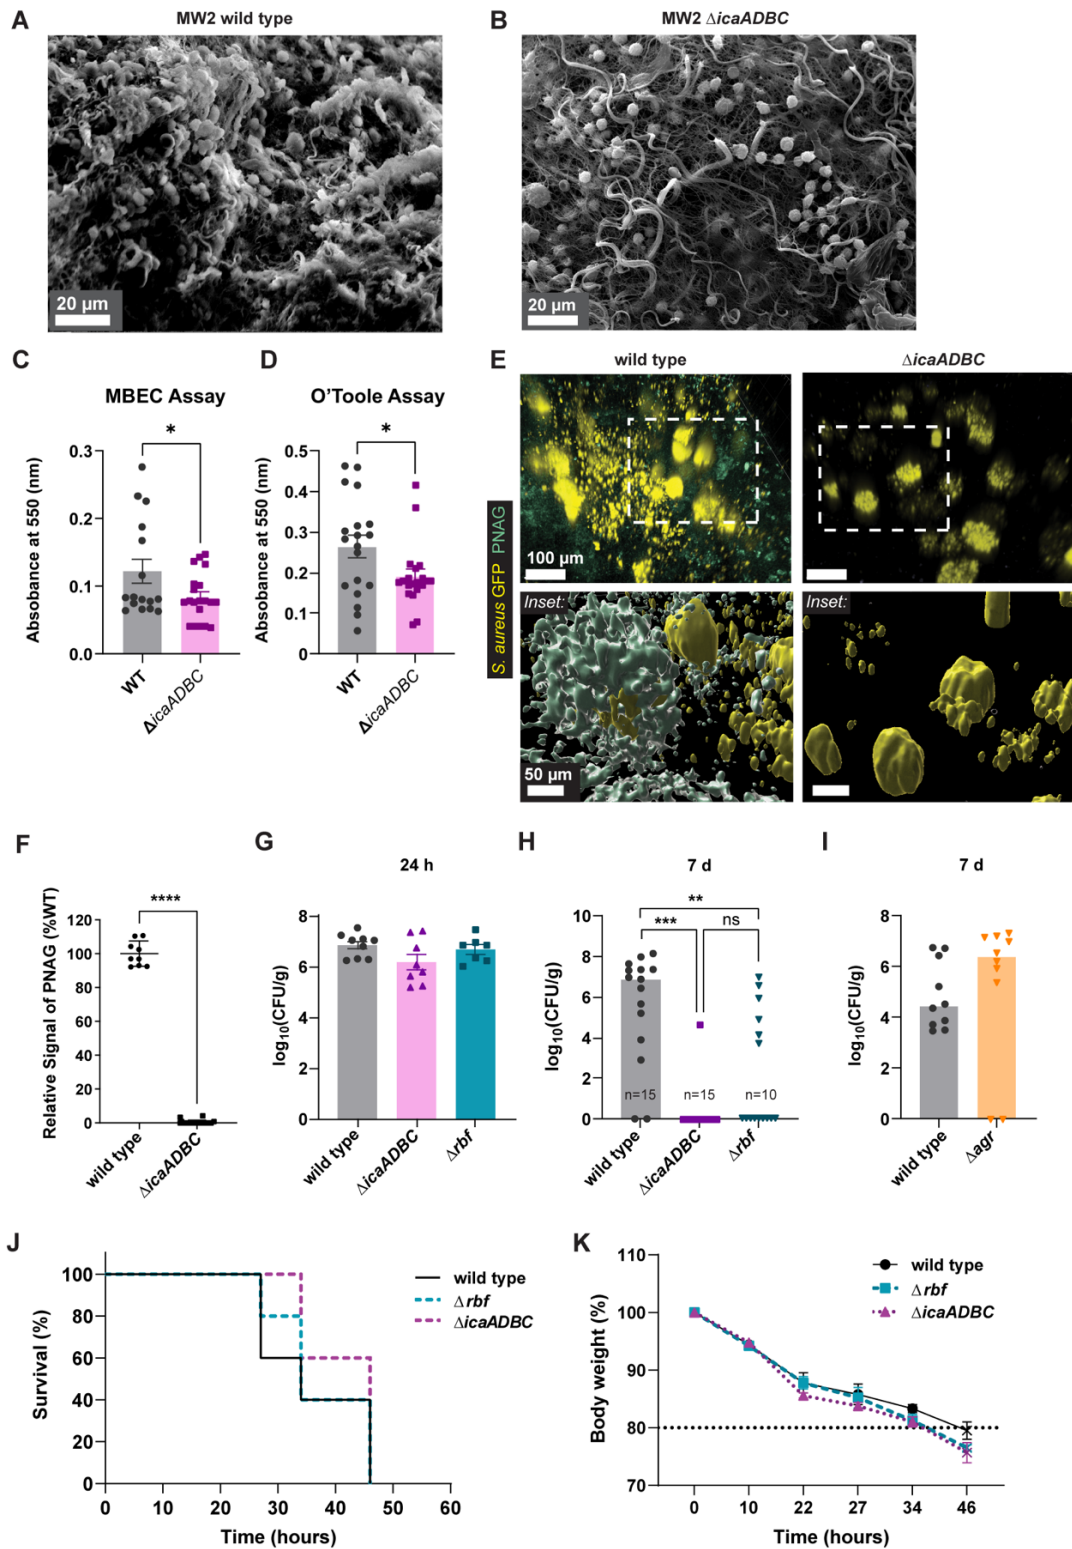

790

791 **Figure 1. PNAG biofilm matrix contributes to *S. aureus* persistence in skin**

792 **(A-B)** Representative scanning electron microscopy images of MW2 wild type and  
793  $\Delta$ *icaADCB* *S. aureus* bead at 24 hours post-infection. **(C-D)** *S. aureus* MW2 wild type or  
794  $\Delta$ *icaADCB* was grown in TSB containing 0.125% glucose for 24 hours and biofilms were  
795 stained with 0.1% crystal violet using two different in vitro biofilm assays. Quantification  
796 of *in vitro* biofilm production using the MBEC assay (formerly Calgary Biofilm Device)  
797 **(C)** and O'Toole assay **(D)** assays. A 10-fold dilution was made for the O'Toole assay. *n*  
798 = 4-5 technical replicates per group from 4 independent experiments. \**p* < 0.05. Student t-  
799 test was used. **(E)** C57 mice were infected with GFP-expressing *S. aureus* wild type or  
800  $\Delta$ *icaADCB* and imaged at 24 h. Topical addition of Alexa Fluor 594-conjugated anti-F598  
801 was added onto the skin infection prior to imaging. Image shows a 3D reconstruction (top)  
802 and surface rendering (bottom) of PNAG in wild type and  $\Delta$ *icaADCB* infections. Scale  
803 bars = 100  $\mu$ m (top) and 50  $\mu$ m (bottom). **(F)** Semi-quantitative PNAG dot blot for *S.*  
804 *aureus* strains containing precisely-engineered deletions of *icaADBC* relative to the wild  
805 type strain. *n* = 3 biological and technical replicates were tested. **(G-I)** C57 mice were  
806 infected with *S. aureus* bead and infections were harvested for quantification of skin CFUs.  
807 **(G)** Bacterial CFUs at 24 hours post-infection with wild type,  $\Delta$ *rbf* and  $\Delta$ *icaADBC*. *n* = 7-  
808 9 from 2 independent experiments. **(H)** Bacterial CFUs at 7 days post-infection with wild  
809 type,  $\Delta$ *rbf* and  $\Delta$ *icaADBC*. *n* = 10-15 from 3 independent experiments. **(I)** Bacterial CFUs  
810 at 7 days post-infection with MW2 wild type and  $\Delta$ *agr*. *n* = 8-10 from 2 independent  
811 experiments. **(J-K)** C57 mice were infected with  $1 \times 10^8$  CFU *S. aureus* wild type,  $\Delta$ *rbf*, or  
812  $\Delta$ *icaADBC* i.v. and mouse survival **(J)** and body weight **(K)** were recorded. *n* = 5 per group  
813 from 1 independent experiment. Student t-test **(C-D, F)** and Kruskal-Wallis test (*P* =  
814 0.0002) with Dunn's multiple comparisons test **(H)** were used. \*\**p* < 0.01, \*\*\**p* < 0.001.  
815 \*\*\*\**p* < 0.0001.

816

817

818  
819

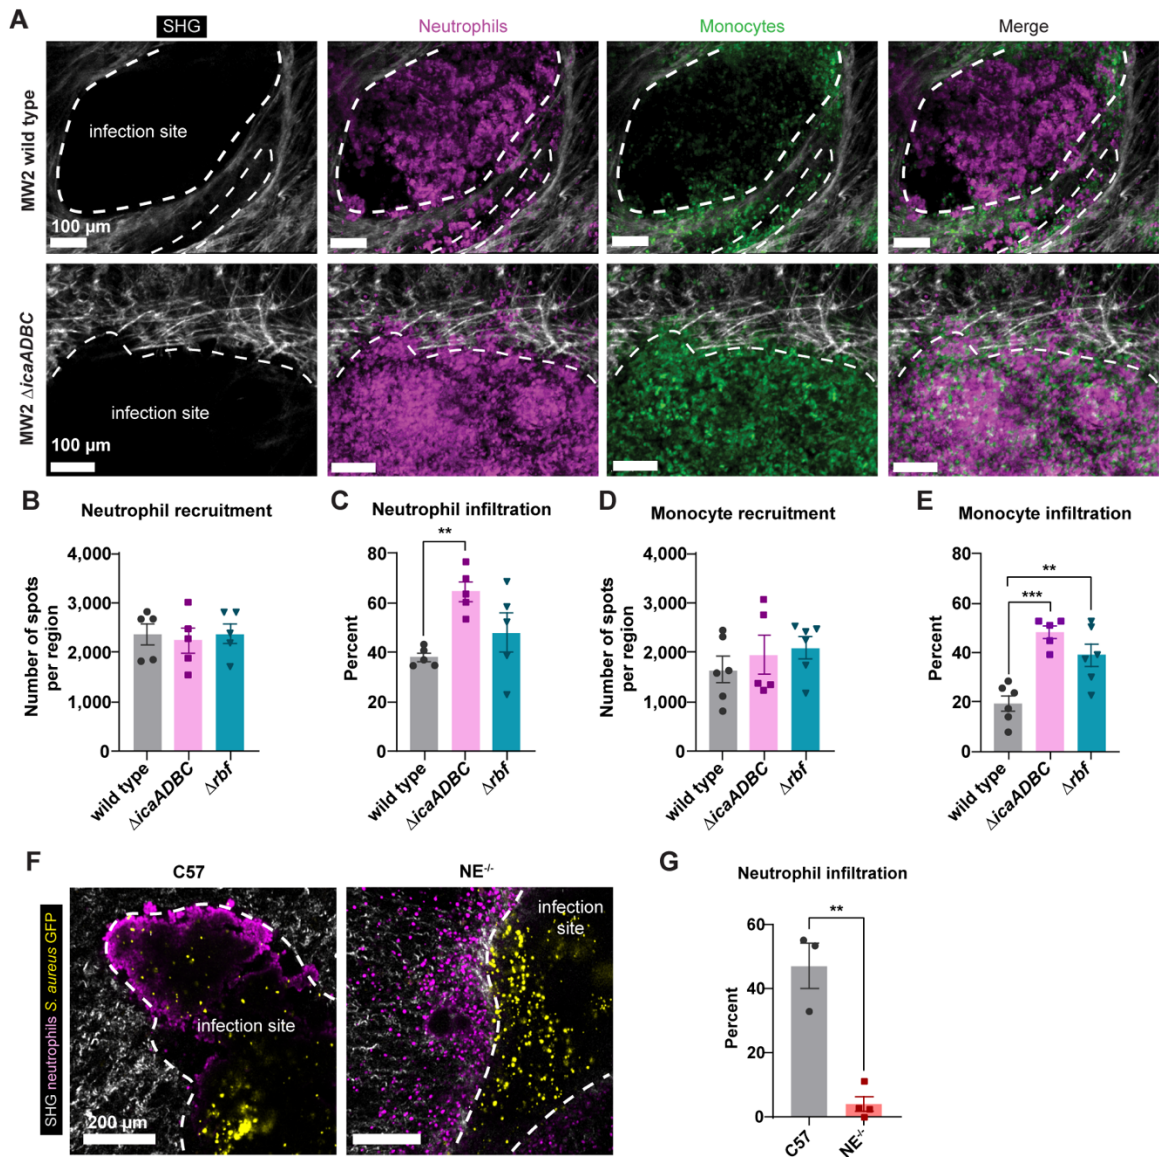

820  
821

822 **Figure 2. *S. aureus* biofilm blocks immune infiltration into the infection**

823 (A-E) Catchup<sup>ivm-red</sup> CX3CR1<sup>gfp/wt</sup> mice were infected with *S. aureus* MW2 wild type,  
824  $\Delta$ rbf, and  $\Delta$ icaADCB bead and imaged at 24 h. (A) Representative stitched image of  
825 infections in wild type and  $\Delta$ icaADCB infected mice. Scale bars = 100  $\mu$ m. (B-E)  
826 Quantification of total numbers of neutrophils (B), percent neutrophil infiltration (C),  
827 total numbers of monocytes (D), and percent monocyte infiltration (E) at 24 hours post-  
828 infection.  $n = 4-5$  per group from two independent experiments. (F-G) C57 or NE<sup>-/-</sup> mice  
829 were infected with GFP-expressing *S. aureus* wild type and skin tissue was processed for  
830 whole mount immunofluorescence staining and imaged on the multiphoton microscope.

831 **(F)** Representative 2D images at 24 h post-infection. **(G)** Quantification of percent  
832 neutrophil infiltration.  $n = 3-4$  from 2 independent experiments. **(C, E, G)** Student t-test  
833 **(G)** and One-way ANOVA ( $P = 0.0118$  for **C**,  $P = 0.0003$  for **E**) with Tukey's multiple  
834 comparison test **(C, E)** were used.  $**p < 0.01$ ,  $***p < 0.001$ .

835

836



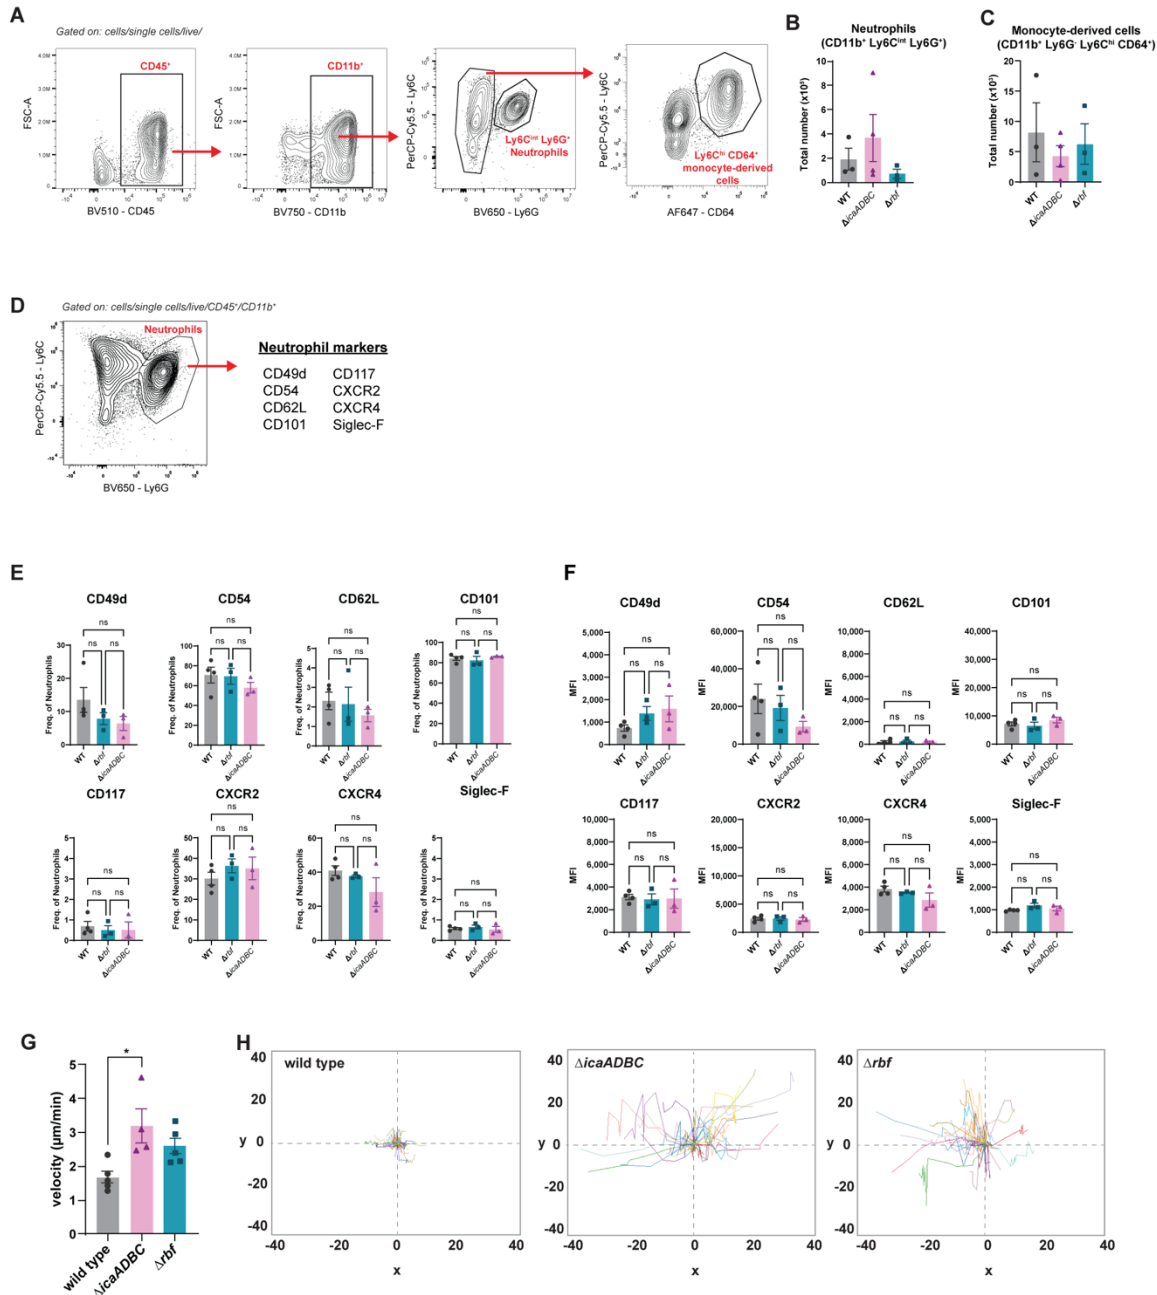

837

838 **Figure 3. Neutrophil heterogeneity and behaviour after *S. aureus* biofilm infection**

839 (A-F) C57 mice were infected *S. aureus* wild type,  $\Delta$ rbf, and  $\Delta$ icaADCB bead and spectral  
 840 flow cytometry was performed at 24 h post-infection. (A) Gating strategy to identify  
 841 neutrophils and monocytes. (B-C) Quantification of total numbers of neutrophils (B) and  
 842 monocytes (C) at 24 h post-infection. (D) List of neutrophil markers used to characterize  
 843 neutrophil heterogeneity at 24 h post-infection. Quantification of frequency (E) and MFI  
 844 (F) of neutrophil subsets.  $n = 3-4$  from one independent experiment.

845 **(G-H)** Catchup<sup>ivm-red</sup> mice were infected with wild type,  $\Delta rbf$ , or  $\Delta icaOP$  *S. aureus* bead  
846 and neutrophil behaviour was analyzed at 24 hours. **(G)** Quantification of neutrophil  
847 velocity over a 10-minute video.  $n = 4-5$  from 2 independent experiments. **(H)**  
848 Representative spider plots showing neutrophil displacement. Each neutrophil track is  
849 identified by different colors. **(B-C, E-F)** One-way ANOVA with Tukey's multiple  
850 comparisons test were used. **(G)** One-way ANOVA ( $P = 0.0165$ ) with Tukey's multiple  
851 comparison test were used.  $*p < 0.05$ .

852

853



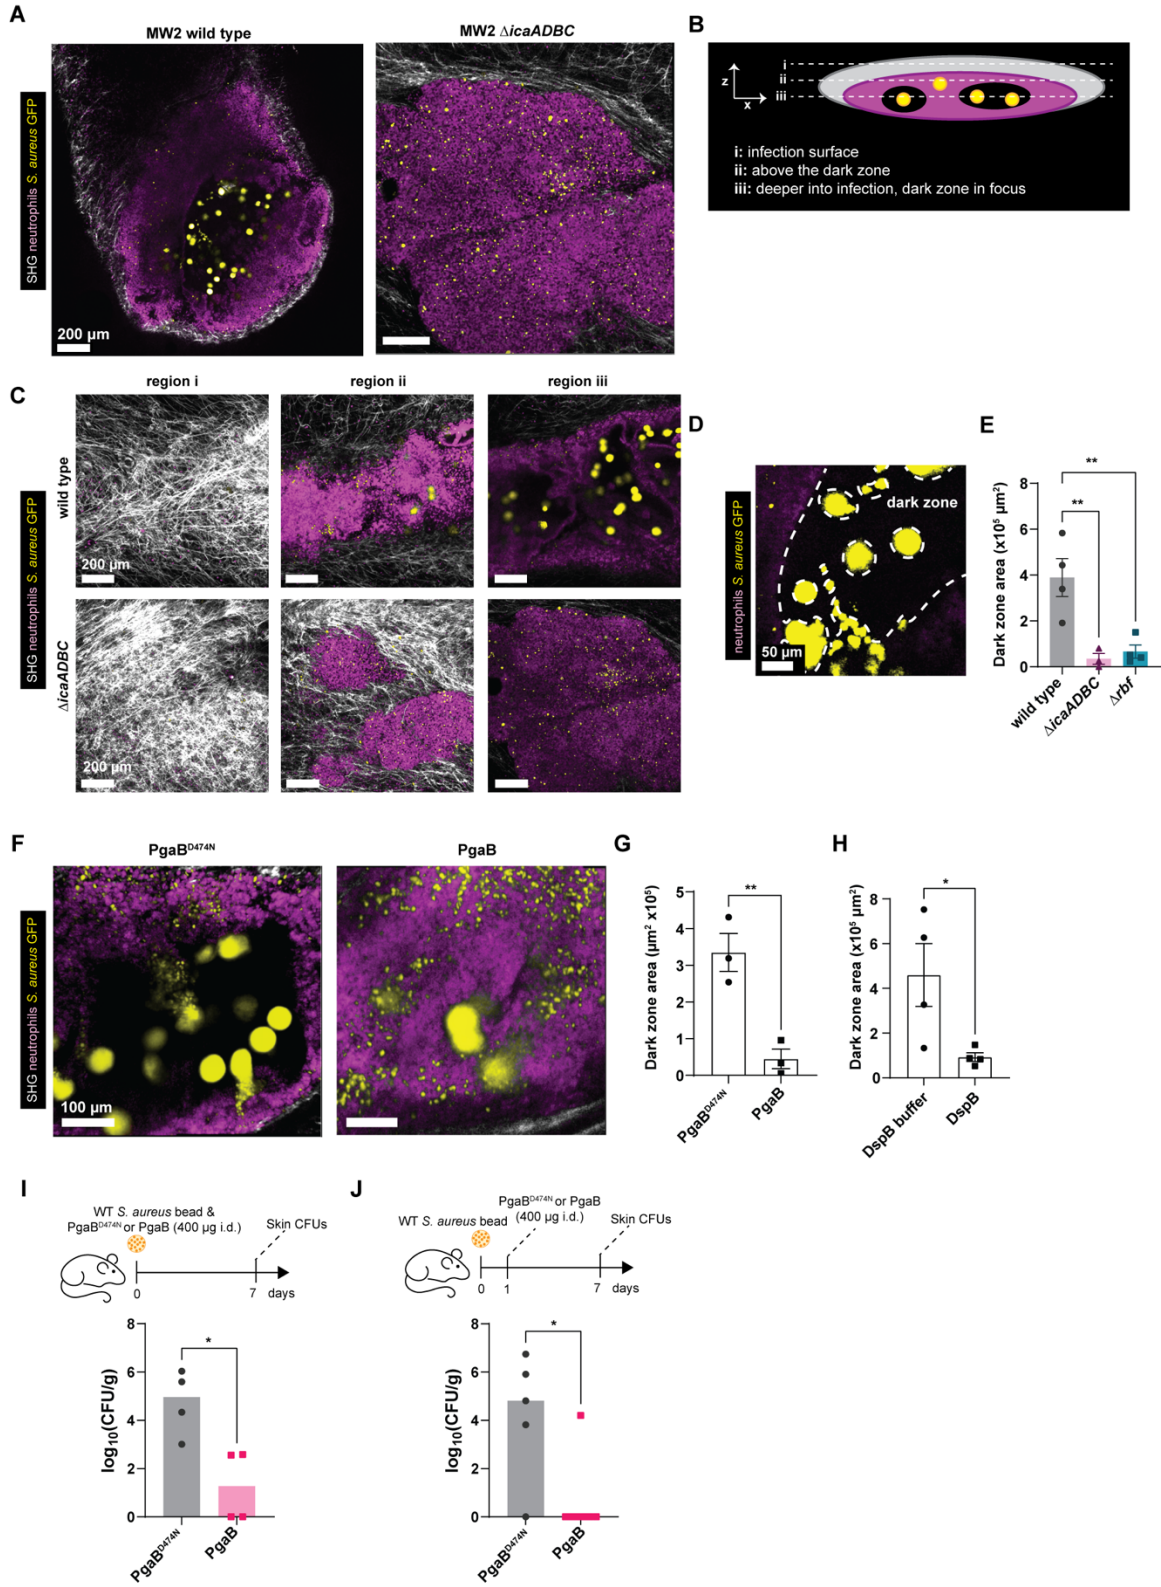

854

855 **Figure 4. Glycoside hydrolases disrupt *S. aureus* biofilm in vivo**

856 **(A-E)** Catchup<sup>ivm-red</sup> mice were infected with GFP-expressing *S. aureus* MW2 wild type,  
857  $\Delta rbf$ , and  $\Delta icaADCB$  and imaged at 24 hours. **(A)** Representative 2D images of wild type  
858 and  $\Delta icaADCB$  infections at 24 hours. Scale bar = 200  $\mu\text{m}$ . **(B)** Schematic showing 3 focal  
859 planes of a 3D z-stack of the infection. **(C)** Representative images showing 3 focal planes  
860 of a 3D z-stack in wild type and  $\Delta icaADCB$  infections. Scale bar = 200  $\mu\text{m}$ . **(D)**  
861 Representative image showing the dark zone highlighted by a dashed line. Scale bar = 50  
862  $\mu\text{m}$ . **(E)** Quantification of dark zone area in wild type,  $\Delta rbf$ , and  $\Delta icaADCB$  infections.  $n$   
863 = 3-4 per group from 2 independent experiments. **(F-G)** Catchup<sup>ivm-red</sup> mice were infected  
864 with GFP-expressing *S. aureus* wild type, treated with PgaB or PgaB<sup>D474N</sup>, and imaged at  
865 24 hours. **(F)** Representative 2D images showing the dark zone after PgaB enzyme  
866 treatment. Scale bar = 100  $\mu\text{m}$ . **(G)** Quantification of dark zone area in PgaB<sup>D474N</sup> or PgaB  
867 treated mice.  $n = 3$  per group from 2 independent experiments. **(H)** Catchup<sup>ivm-red</sup> mice  
868 were infected with GFP-expressing *S. aureus* wild type, treated with DspB or DspB buffer,  
869 and imaged at 24 hours. Quantification of dark zone area in DspB or DspB buffer treated  
870 mice.  $n = 4$  per group from 2 independent experiments. **(I-J)** C57 mice were infected with  
871 *S. aureus* wild type bead, treated with PgaB or PgaB<sup>D474N</sup> at the time of infection **(I)** or at  
872 24 h post-infection **(J)** and skin infections were harvested at 7 days post-infection for  
873 CFUs.  $n = 4$  per group **(I)** and  $n = 5-7$  per group **(J)** from 2 independent experiments. **(E,**  
874 **G, H-J)** One-way ANOVA with Tukey's multiple comparison test ( $P = 0.0038$ ) **(E)** and  
875 Student t-test **(G, H-J)** were used.  $*p < 0.05$ ,  $**p < 0.01$ .

876

877

878

879 **Supplementary videos**

880 **Video S1. Neutrophil behaviour during biofilm infection**

881 Catchup<sup>ivm-red</sup> mice were infected with GFP-expressing *S. aureus* MW2 WT,  $\Delta$ *icaADBC*,  
882 or  $\Delta$ *rbf* bead and imaged at 24h post-infection. A 3D timelapse video was taken and  
883 neutrophil behaviour was analyzed using Imaris. Video shows neutrophils (magenta), *S.*  
884 *aureus* GFP (yellow) and collagen (grey).
